# Supplementary material
Source: Springer Nature journal article supplement (https://www.springermedizin.de/resource/supplementary/12906_2012_1304_MOESM11_ESM.pdf/9522416)

**Bax/BcL2 Ratio**

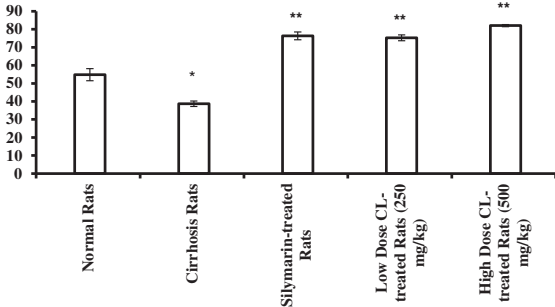

Supplement: MOESM11 [file 9522416]
